# Supplementary material
Source: PubMed Central journal article supplement (PMC10843988)
Supplement: NIHMS1905024-supplement-8.pdf [file NIHMS1905024-supplement-8.pdf]

**Supplementary Figure S1. Separate waves of immune cell infiltration during wound closure, related to Figure 1.**

**(A)** Experimental layout of immune cell profiling during skin wound repair. Four full thickness circular dorsal skin wounds of 4 mm diameter were caused in mice. Wound and surrounding tissue was collected using an 8 mm diameter punch biopsy. A single cell suspension was generated prior to barcoding, staining, and analysis on a mass cytometer and two to four wounds were pooled per mouse. Data in Supplementary Figure S1 represents one of two representative experiments.

**(B)** UMAP projection of immune cells detected during skin wound repair based on a 40-marker panel.

**(C)** Heatmap of marker expression across all identified cell clusters. Mean intensity of each marker is plotted as scaled value across column.

**(D)** Diameter of wounds plotted over time of two separate experiments. Each dot represents the mean diameter of 4-12 wounds from 1-3 mice per timepoint. Error bars represent  $\pm$ SD.

**(E)** Line plots of all immune cell clusters identified in (B) plotted as percentage of all CD45<sup>+</sup> immune cells per timepoint of wound sampling (left y-axis). Dotted line represents wound diameter (right y-axis). Dots represent mean values of n=3 mice per timepoint. Error bars represent  $\pm$ SD.

**(F)** Phenotypic earth mover's distance (PhEMD) diffusion map embedding, as described in Chen et al.<sup>41</sup>, of all samples collected during wound closure. Each dot represents the wound-resident immune cell composition of one mouse. Dots are color-coded by day and n=3 mice were collected per timepoint. UW, unwounded. DC, diffusion coefficient.

**(G)** scRNA-Seq UMAP plot of CD45<sup>+</sup> immune cells found during skin repair.

**(H)** Bubble plot of differentially expressed genes across all identified clusters in (G).

**(I)** Bubble plot of differentially expressed genes across all Mono\_Mac subpopulations.

**(J)** UMAP plot of all monocyte/macrophage cells. Violet color intensity indicates mRNA expression level of *H2-Ab1* (gene encoding structural component of MHCII complex) and *Nr4a3* within each cell.

**(K)** UMAP plot of MHCII<sup>hi</sup> Mono\_Mac subset.

**(L)** Gene expression of select genes along pseudotime. D00 represents unwounded skin.

**(M)** Right: Space-time tile plot representing the non-Mono\_MAC CD45<sup>+</sup> subpopulations identified in the scRNAseq dataset during wound healing from Figure S1G. Tiles are color-coded relative to unwounded (UW) state of displayed cell subpopulation: red indicates increase, blue indicates decrease, white indicates no change in subpopulation compared to UW.

**(N)** Space-time tile plots representing the Mono\_2 and Mono\_MHCII subpopulations within the Mono\_Mac object. Tiles are color-coded relative to unwounded (UW) state of displayed cell subpopulation: red indicates increase, blue indicates decrease, white indicates no change in subpopulation compared to UW.

See also Figure 1.



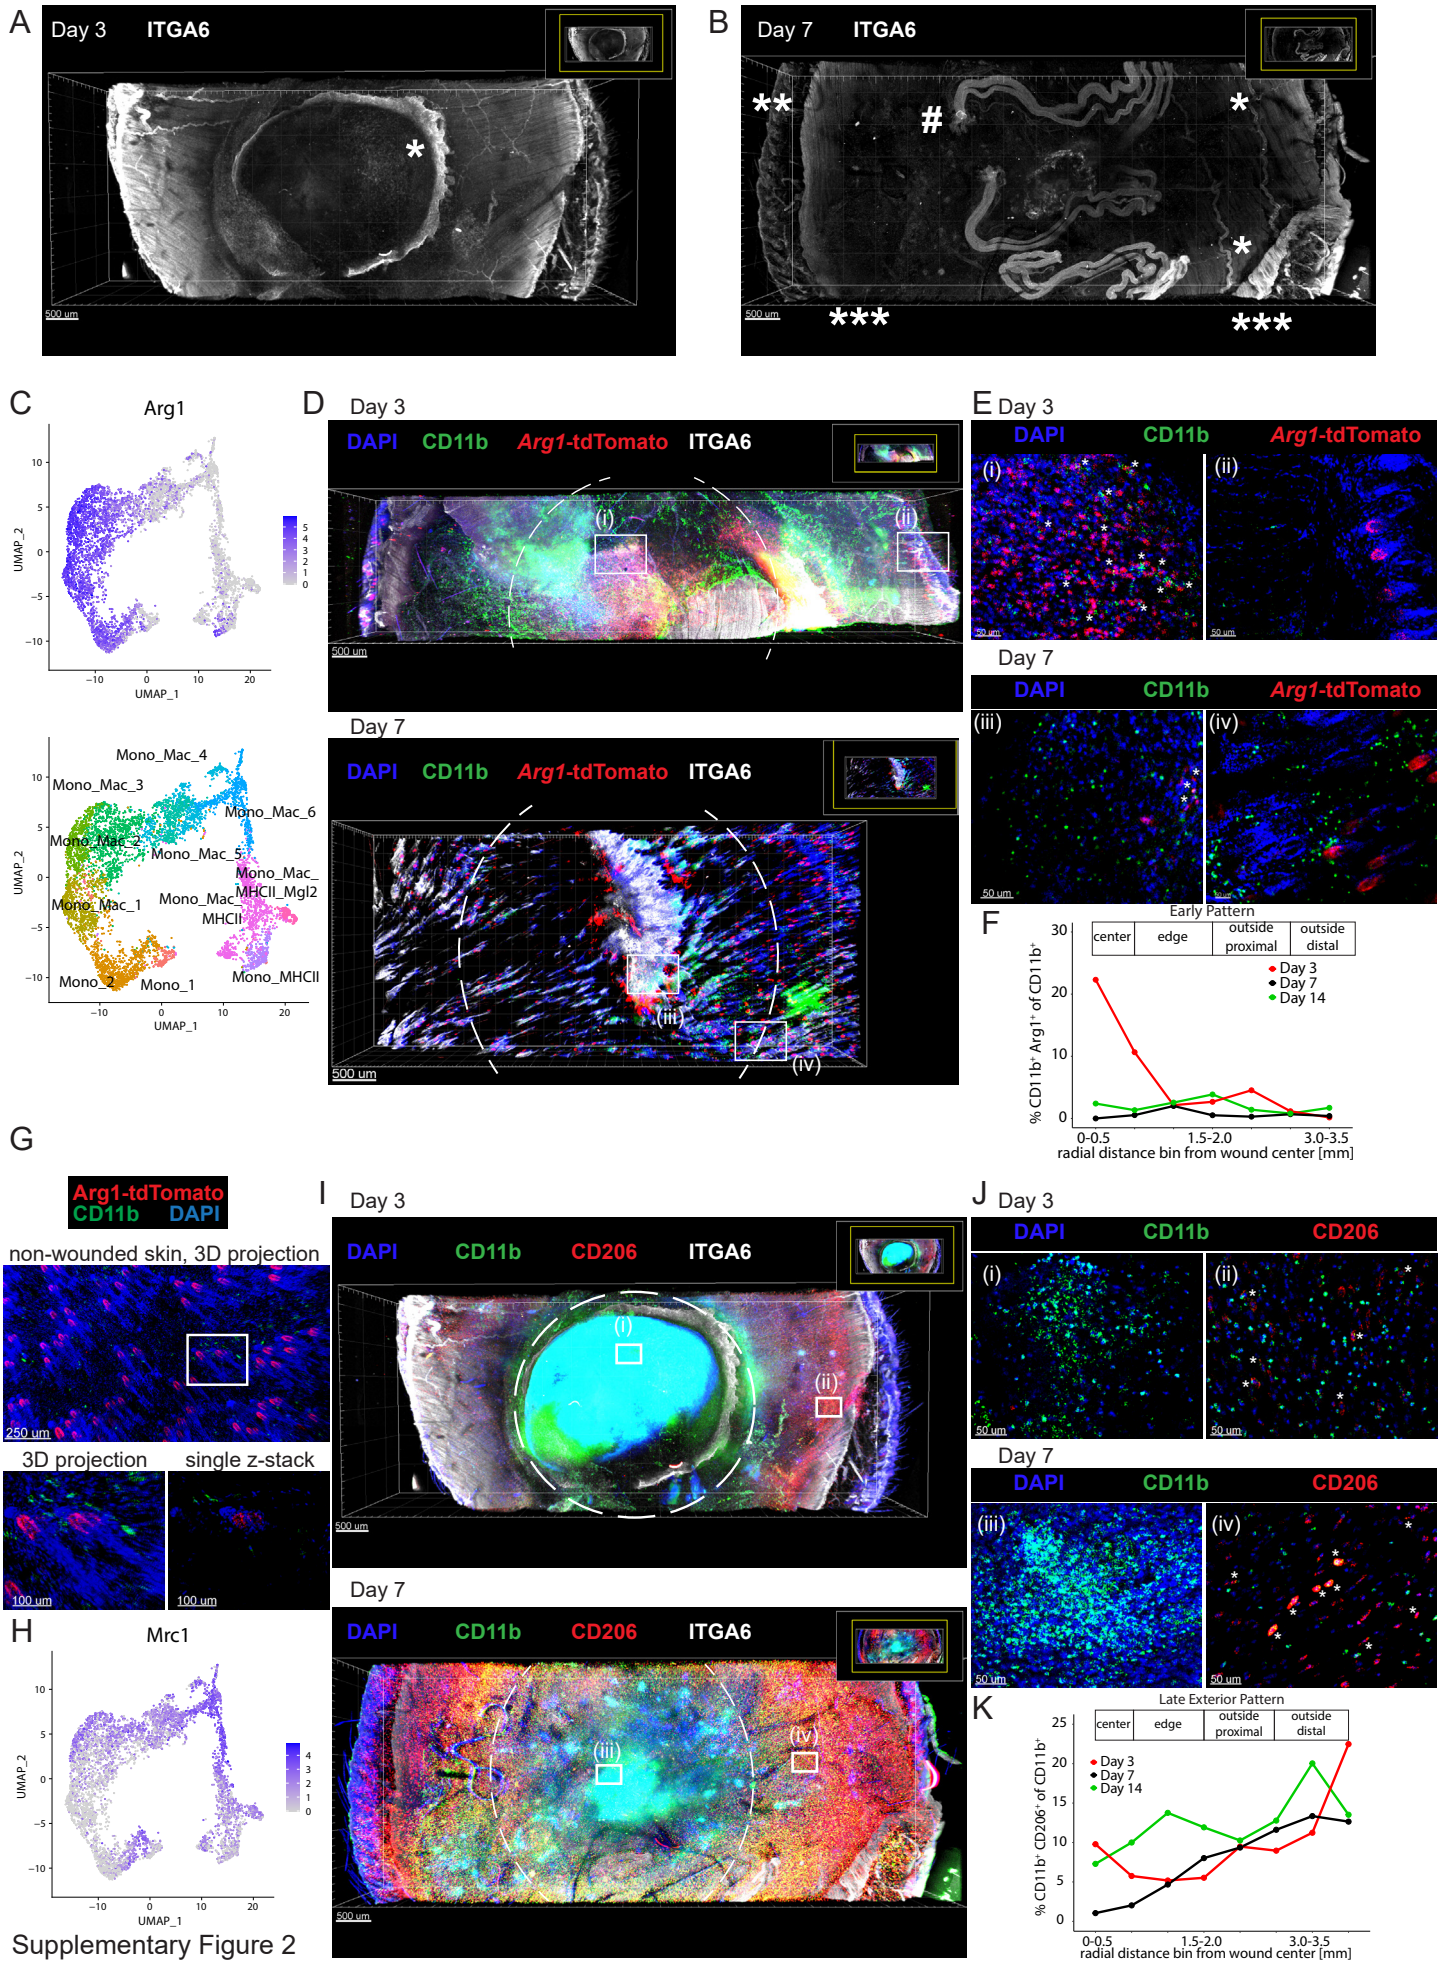

Supplementary Figure 2

**Supplementary Figure S2. Whole-mount imaging of wound tissue, related to Figure 2.**

**(A)** Top-down view of D3 post-wounding imaged sample. Fluorescent stain of CD49f/ITGA6 is shown in white. \*Edge of wound with re-established epithelial basement membrane. See Movie S1 for 3D view. One of two representative experiments is shown.

**(B)** Top-down view of D7 post-wounding imaged sample. Fluorescent stain of CD49f/ITGA6 is shown in white. \*Vasculature in non-wounded skin, \*\*hair follicles, \*\*\*fascia, #severed nerve bundle. See Movie S2 for 3D view. One of two representative experiments is shown.

**(C)** Top: UMAP plot of all Mono\_Mac clusters. Blue color intensity indicates mRNA expression level of *Arg1* within each cell. Bottom: UMAP plot of Mono\_Mac subsets.

**(D)** Top-down view of stained wound sample from *Arg1*-tdTomato reporter mouse (top) day 3 and (bottom) day 7 post-wounding. Boxes highlight zoom-ins shown in (E). One of two representative images is shown for each day.

**(E)** Zoom-in of boxes from (D) displaying single z-stack. Images depict wound center region (i) and (iii) or wound distal region (ii) and (iv). CD11b<sup>+</sup> *Arg1*-tdTomato<sup>+</sup> double-positive cells are highlighted by an asterisk, which are predominantly found in the wound center on day 3. Bar, 50 μm.

**(F)** Similar to Figure 2E. Quantification of CD11b<sup>+</sup> *Arg1*<sup>+</sup> cells relative to distance from the center of the wound from repeat experiment. Percentage of CD11b<sup>+</sup> *Arg1*<sup>+</sup> of all CD11b<sup>+</sup> are plotted by day post wounding, representing an 'Early Pattern'.

**(G)** Top-down view of Ce3D-cleared unwounded skin from *Arg1*-reporter mouse stained with antibody against CD11b (green). *Arg1*<sup>+</sup> CD11b<sup>-</sup> signal (red) visible in hair follicle bulge. Bottom left, zoomed-in 3D projection of box in top image. Bottom right, single z-stack of zoomed-in region showing no CD11b<sup>+</sup> signal in *Arg1*<sup>+</sup> hair follicle bulge.

**(H)** UMAP plot of all CD45<sup>+</sup> immune cells. Blue color intensity indicates mRNA expression level of *Mrc1* within each cell.

**(I)** Top-down view of stained wound sample from WT mouse (top) day 3 and (bottom) day 7 post-wounding. Boxes highlight zoom-ins shown in (H). One of two representative images is shown for each day.

**(J)** Zoom-in of boxes from (H) displaying single z-stack. Images depict wound center regions (i) and (iii) or wound distal regions (ii) and (iv). CD11b<sup>+</sup> CD206<sup>+</sup> double-positive cells are highlighted by an asterisk, which are only found in unwounded skin on day 3 and day 7, and on the wound edge on day 7. Bar, 50 μm.

**(K)** Similar to Figure 2G. Quantification of CD11b<sup>+</sup> CD206<sup>+</sup> cells relative to distance from the center of the wound from repeat experiment. Percentage of CD11b<sup>+</sup> CD206<sup>+</sup> of all CD11b<sup>+</sup> are plotted by day post wounding, representing a 'Late Exterior Pattern'.

See also Figure 2.



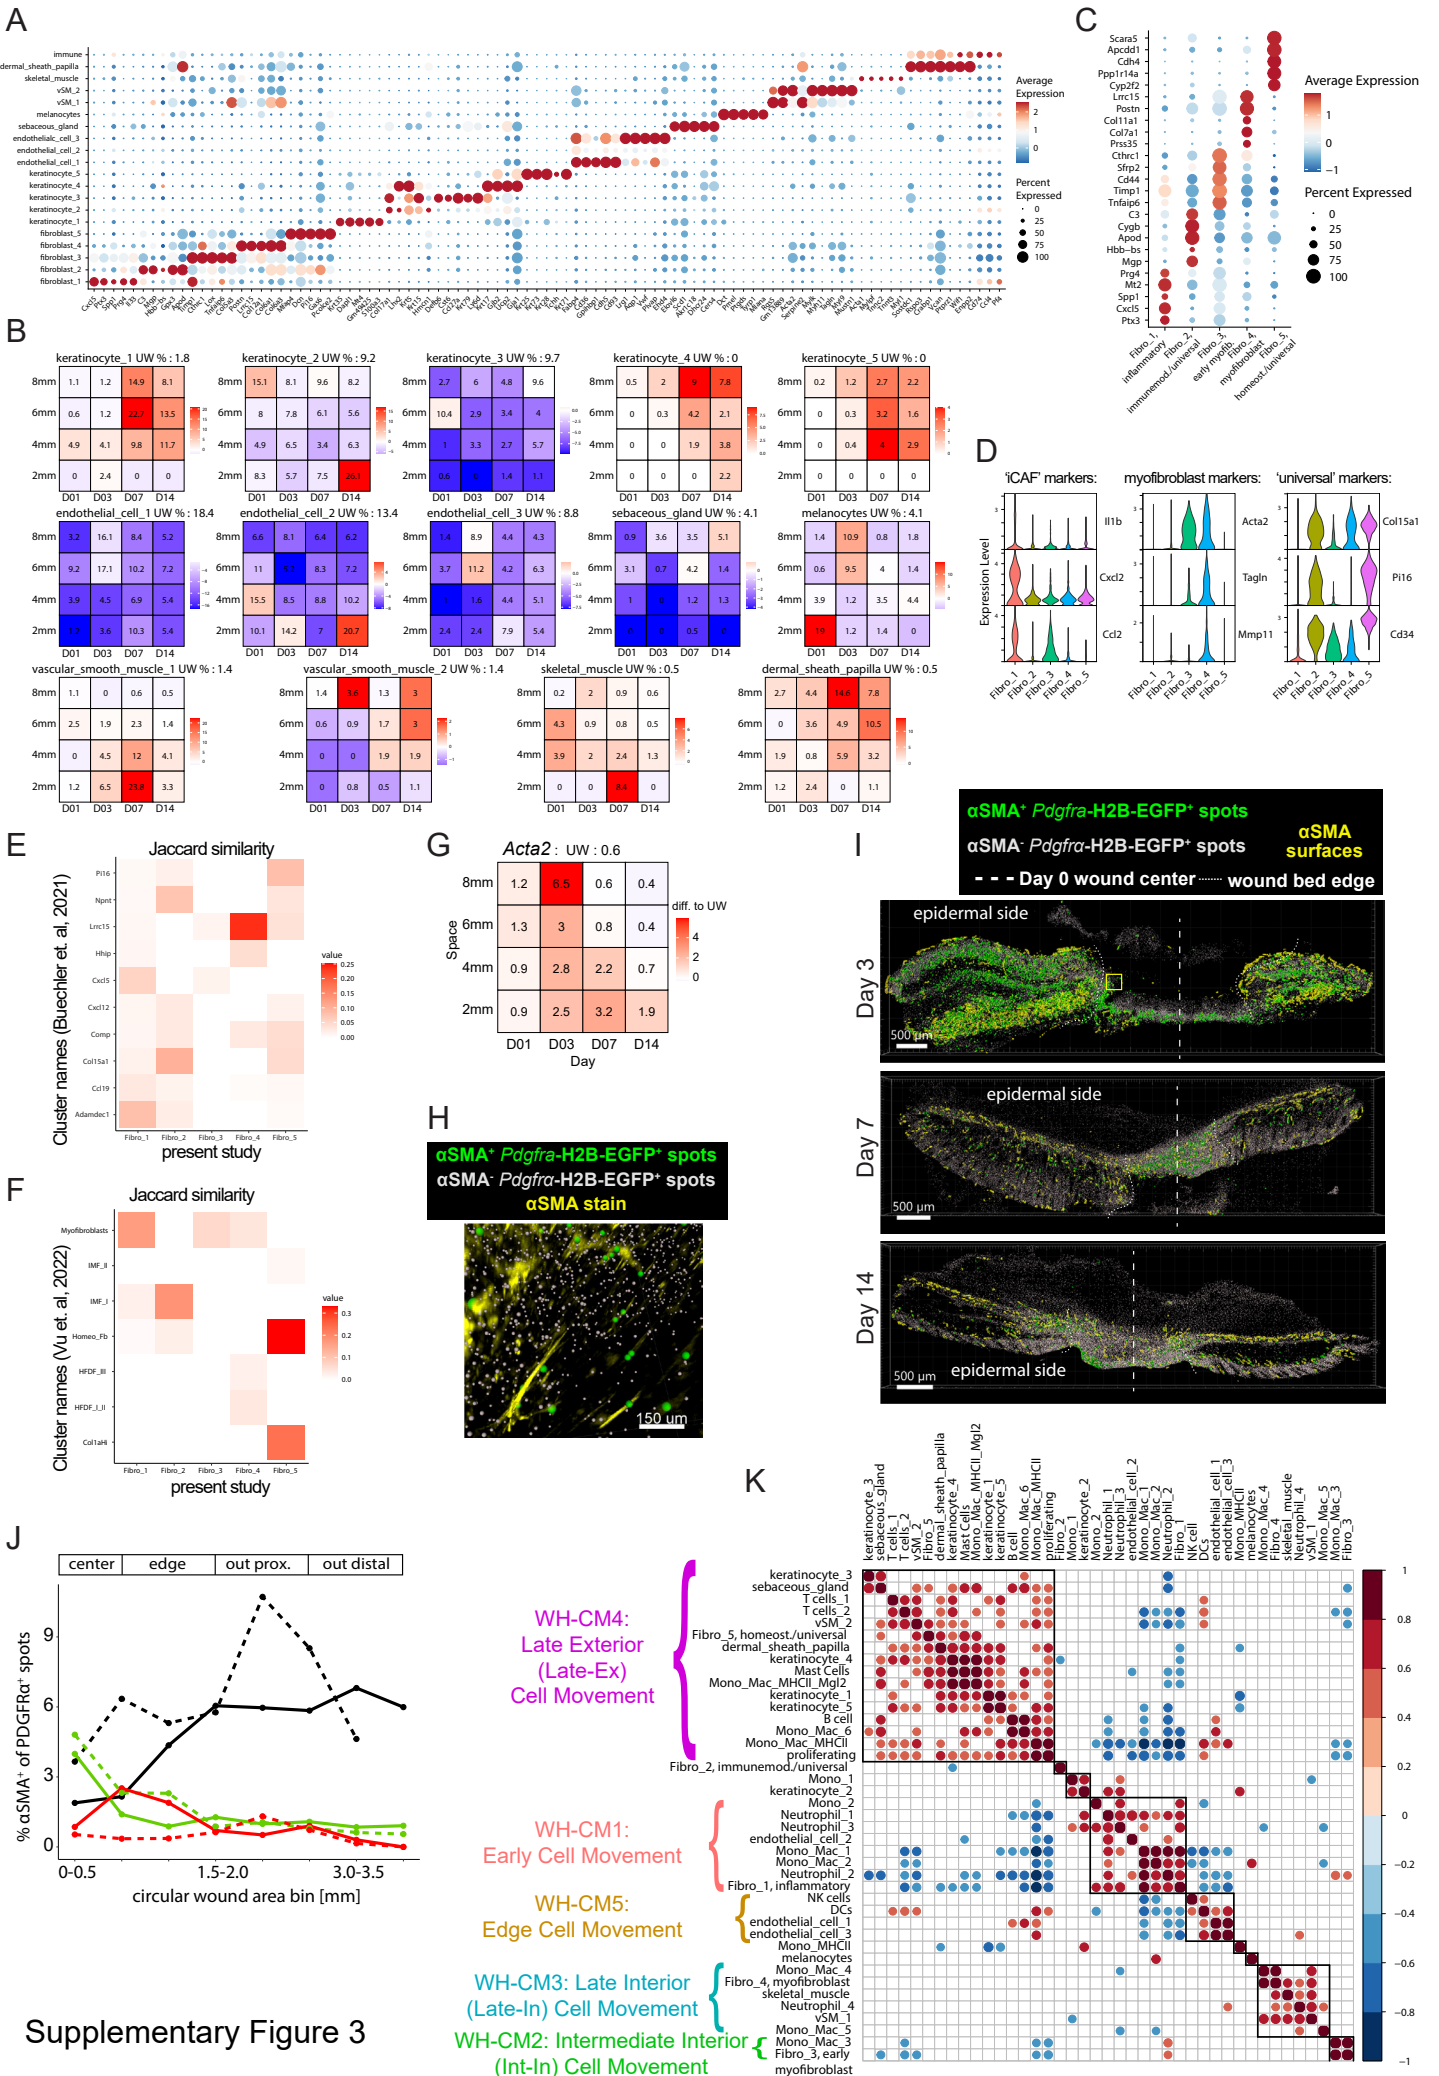

Supplementary Figure 3

**Supplementary Figure S3. Identification of non-immune cells in wound scRNAseq data and their relation to immune cells, related to Figure 3.**

**(A)** Bubble plot of differentially expressed genes across all identified CD45<sup>-</sup> non-immune cell clusters. Cluster labelled 'immune' expressed high levels of the MHCII invariant chain *Cd74* and was excluded from further analysis.

**(B)** Space-time tile plots of all CD45<sup>-</sup> non-fibroblast non-immune cells identified in the scRNAseq dataset during skin repair. Percentage within all CD45<sup>-</sup> non-immune cells is plotted by day and space post-wounding. Tiles are color-coded relative to unwounded (UW) state of displayed cell subpopulation: red indicates increase, blue indicates decrease, white indicates no change in subpopulation compared to UW.

**(C)** Bubble plot of differentially expressed genes across all fibroblast subpopulations identified during wound skin repair.

**(D)** Stacked violin plots of select inflammatory cancer-associated fibroblast (iCAF) markers (left), myofibroblast markers (middle), and 'universal' fibroblast markers (right) plotted as natural log-normalized mRNA expression level. Individual violin plots are ordered by fibroblast clusters identified in this study.

**(E)** Heatmap depicting Jaccard similarity of cluster-specific genes between fibroblast clusters identified in Buechler et al., 2021, and fibroblast subpopulations in present study. About 25% of all differentially expressed genes in *Lrrc15* cluster from Buechler et al., 2021, and *Fibro\_4* cluster in present study were shared.

**(F)** Heatmap depicting Jaccard similarity of cluster-specific genes between fibroblast clusters identified in Vu et al., 2022, and fibroblast subpopulations in present study. About 30% of all differentially expressed genes in *Homeo\_Fb* cluster from Vu et al., 2022, and *Fibro\_5* cluster in present study were shared.

**(G)** Space-time tile plot of *Acta2* (gene encoding for  $\alpha$ SMA) mRNA expression (normalized to depth) within all fibroblasts. Tiles are color-coded relative to unwounded (UW) state. Red, high. White, low.

**(H)** Zoom-in of Ce3D-cleared 250  $\mu$ m thick section of D3 wounded skin (yellow box) in *Pdgfra*-H2B-EGFP<sup>+WT</sup> mice stained with anti- $\alpha$ SMA antibody (yellow). Image was processed to show  $\alpha$ SMA<sup>-</sup> *Pdgfra*<sup>+</sup> (grey) and  $\alpha$ SMA<sup>+</sup> *Pdgfra*<sup>+</sup> (green) spots. Scale bar denotes 150 microns.

**(I)** 3D-views of dorsal skin wound cross-sections from *Pdgfra*-H2B-EGFP<sup>+WT</sup> mice collected at (top) day 3, (middle) day 7, and (bottom) day 14 post-wounding. Images were processed to depict  $\alpha$ SMA<sup>+</sup> *Pdgfra*-H2B-EGFP<sup>+</sup> spots in green,  $\alpha$ SMA<sup>-</sup> *Pdgfra*-H2B-EGFP<sup>+</sup> spots in grey, and  $\alpha$ SMA<sup>+</sup> *Pdgfra*-H2B-EGFP<sup>-</sup> surfaces in violet.  $\alpha$ SMA<sup>+</sup> *Pdgfra*-H2B-EGFP<sup>-</sup> surfaces most likely represent vascular smooth muscle cells surrounding blood vessels. Day 0 wound center annotated by dashed vertical line and wound bed edge annotated by dotted line. Images representative of 2 independent experimental replicates. Yellow box on D3 sample represents approximate zoom-in in figure S3U. Scale bar denotes 500 microns.

**(J)** Quantification of  $\alpha$ SMA<sup>+</sup> *Pdgfra*-H2B-EGFP<sup>+</sup> double-positive spots of all *Pdgfra*-H2B-EGFP<sup>+</sup> spots in (I) relative to distance from the center of the wound. Percentage of double-positive  $\alpha$ SMA<sup>+</sup> *Pdgfra*-H2B-EGFP<sup>+</sup> spots are plotted by day post wounding. Data represents two independent replicates with line dashes representing each replicate.

**(K)** Pearson correlation matrix output of STCA comparing all identified CD45<sup>+</sup> immune and CD45<sup>-</sup> non-immune cell subpopulations. Dots shown represent statistically significant pairs (p-value<0.05) and color indicates Pearson's correlation coefficient.

See also Figure 3.

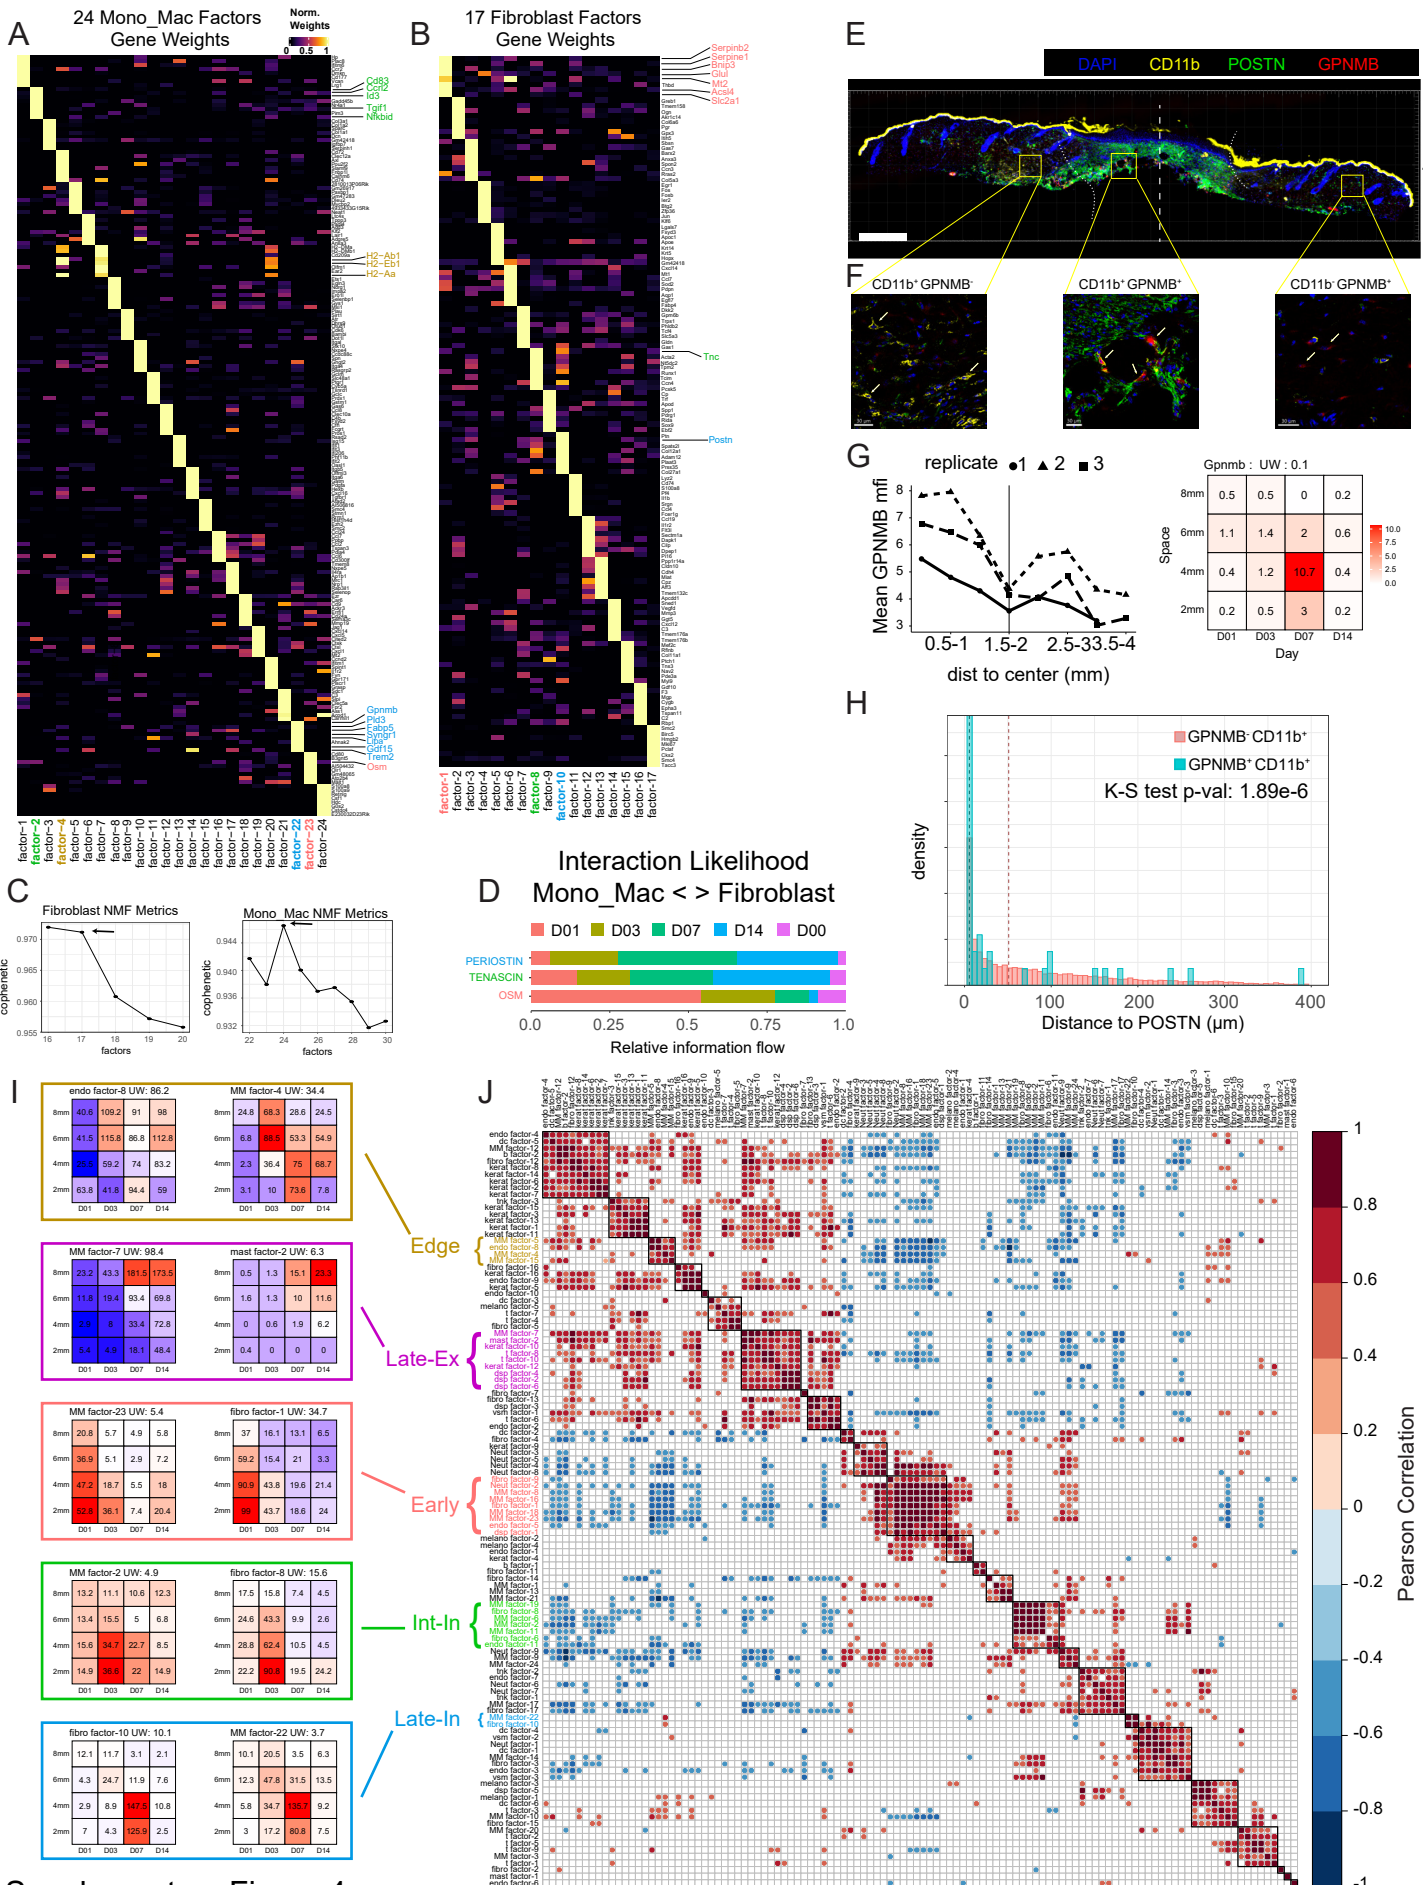



**Supplementary Figure S4. CellChat and NMF analysis of wound scRNAseq data set, related to Figure 4.**

**(A)** Heatmap showing gene weights for the top 8 contributing genes for each factor in the Mono\_Mac subset. Values shown are normalized across the rows such that each gene has a maximal contribution of 1 towards a given factor.

**(B)** Same analysis as in (A) for the fibroblast subset.

**(C)** Plot showing strategy for choosing optimal number of factors for NMF decomposition. The factor number prior to a sharp downturn in cophenetic score (stability measure) was chosen.

**(D)** CellChat stacked bar plot showing relative information flow computed within the Mono\_Mac and Fibroblast merged datasets split by timepoint (D00, D1, D3, D7 and D14 following wounding) for the PERIOSTIN, TNC, and OSM pathways.

**(E)** 3D-views of dorsal skin wound cross-sections collected at (top) day 7 post-wounding showing staining for POSTN, CD11b, and GPNMB. Day 0 wound center annotated by dashed vertical line and approximate wound bed edge annotated by dotted line. Images representative of 3 independent experimental replicates. Scale bar denotes 500 microns.

**(F)** Inset images focusing on clusters of both GPNMB+ CD11b+ cells and GPNMB- CD11b+ cells and the presence or absence of POSTN signal nearby. Scale bar denotes 20 microns.

**(G)** Quantification of mean fluorescence intensity of GPNMB staining for CD11b+ cells as a function of distance from the wound center. Line type represents three independent replicates. Accompanying Tileplot denoting mean expression of Gpnmb in the Mono\_mac object as a function of space and time in the wound healing scRNA-Seq dataset. Red tiles denote increase relative to the unwounded state while blue tiles denote decrease relative to unwounded skin.

**(H)** Histogram showing the distribution of distances to the nearest POSTN+ Surface from either GPNMB+ CD11b+ cells or GPNMB-CD11b+ cells. K-S test performed for similarity of distributions. Dotted lines represent the medians of the two distributions.

**(I)** Tile plots showing average factor loading over space-time for two selected gene programs belonging to the major classes defined (Early/Int-In/Late-In/Late-Ex/Edge) in Figure S4J. are highlighted with matching colors. Red tiles denote increase relative to the unwounded state while blue tiles denote decrease relative to unwounded skin.

**(J)** Correlation matrix showing the space-time correlation between 114 factors generated from each of the coarse-grained cell type definitions identified in Figures S1J and 4A. Dots shown represent statistically significant pairs ( $p$ -value $<0.05$ ) and color indicates Pearson's correlation coefficient. Abbreviations: endo, endothelial; dc, dendritic cell; MM, Mono\_Mac; fibro, fibroblast; kerat, keratinocyte; tnk, T and NK cell; t, T cell; mast, mast cell; dsp, dermal sheath papilla; vsm, vascular smooth muscle; Neut, neutrophil; melano, melanocyte; b, B cell.

See also Figure 4.

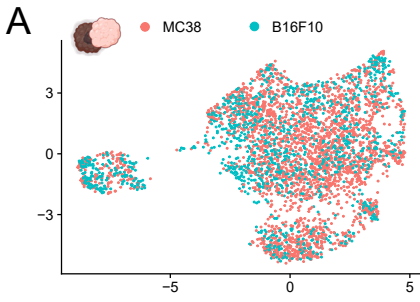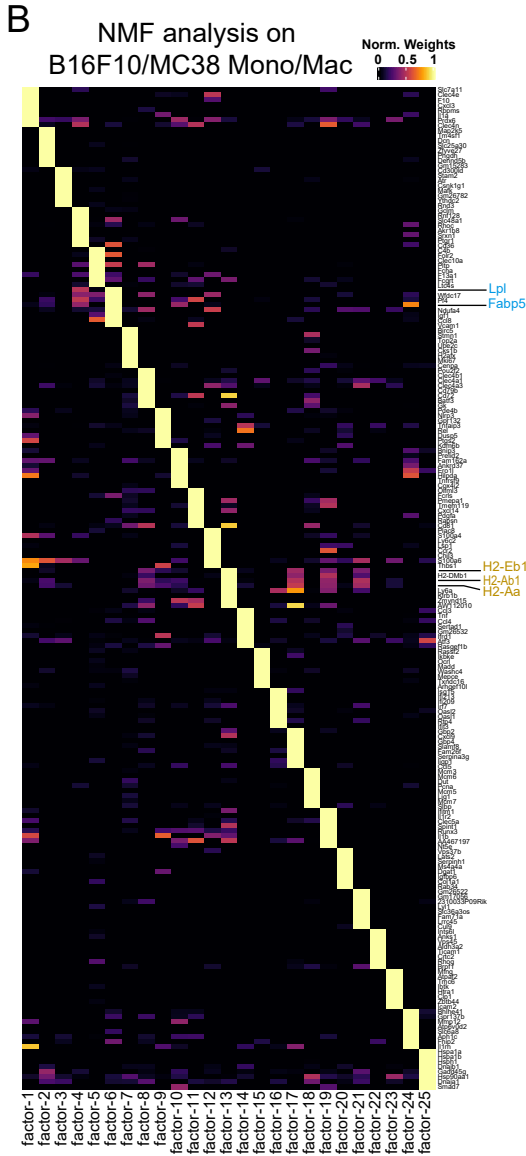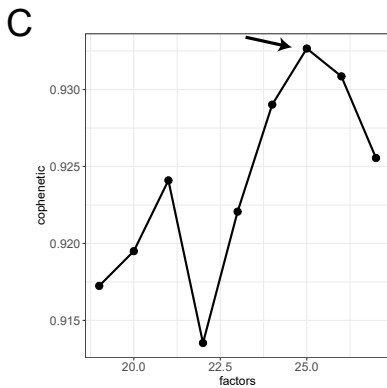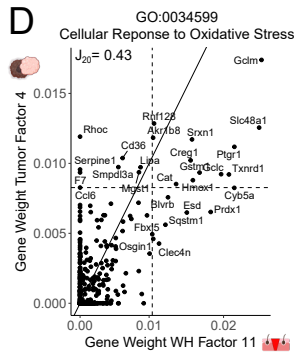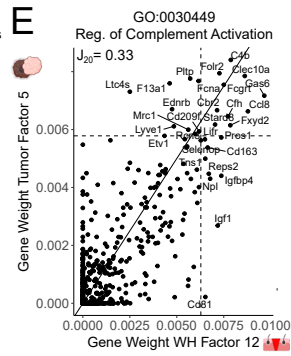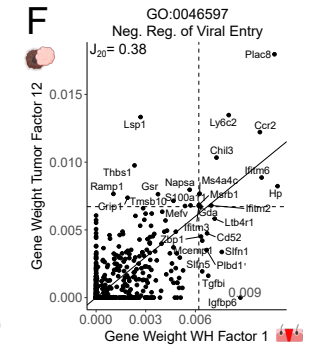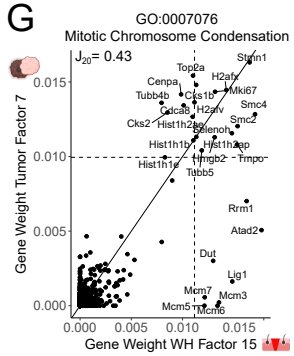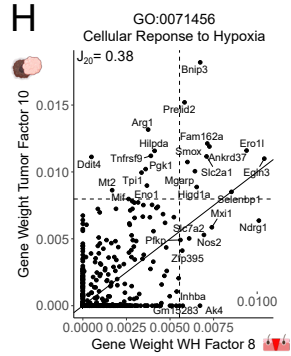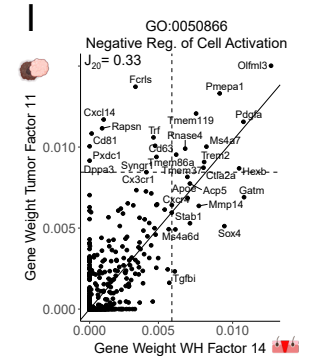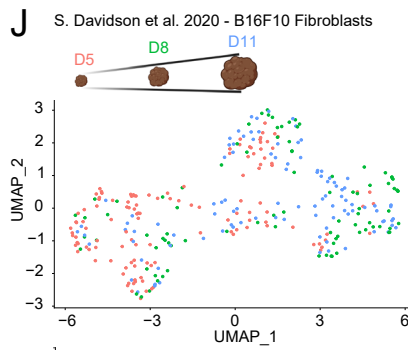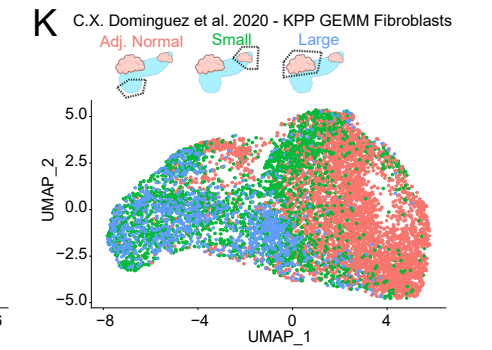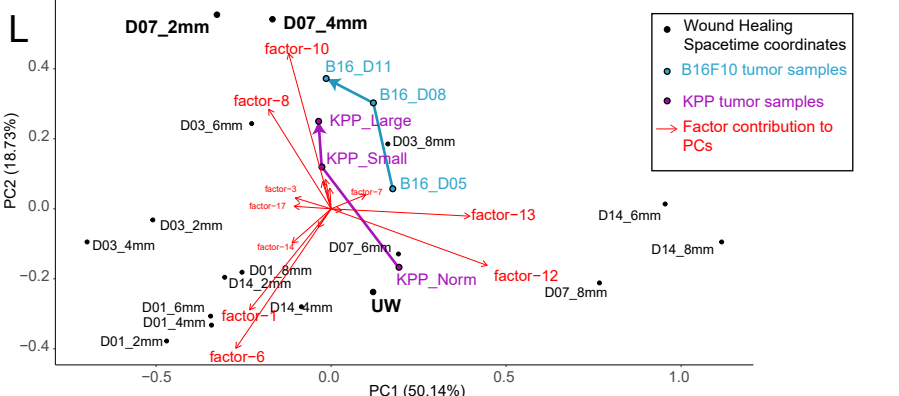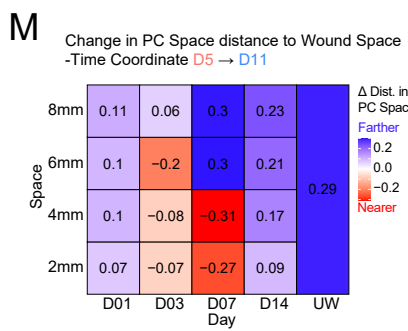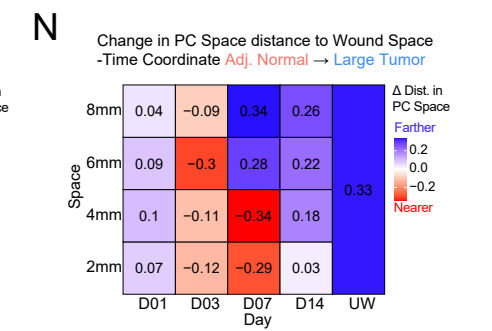

Supplementary Figure 5

**Supplementary Figure S5. Translation of mouse wound gene programs to mouse cancer models, related to Figure 5.**

- (A)** UMAP dimensional reduction on integrated MC38 and B16F10 Mono\_Mac datasets (n=3859 cells)
- (B)** Heatmap showing gene weights for the top 8 contributing genes for each factor in the Mono\_Mac combined B16F10 and MC38 dataset. Values shown are normalized across the rows such that each gene has a maximal contribution of 1 towards a given factor.
- (C)** Plot showing strategy for choosing optimal number of factors for NMF decomposition. The factor number prior to a sharp downturn in cophenetic score (stability measure) was chosen.
- (D-I)** Scatter plots for selected tumor/WH factor pairs for **(D)** Tumor factor-4 vs WH factor-11, **(E)** Tumor factor-5 vs WH factor-12, **(F)** Tumor factor-7 vs WH factor-15, **(G)** Tumor factor-10 and WH factor-8, **(H)** Tumor factor-11 and WH factor-14, and **(I)** Tumor factor-12 and WH factor-1 with the gene weight contributions plotted as calculated from the basis matrix in the NMF output (see Figure S4A for WH factors and S5B for tumor factors). Slope represents  $x=y$  line and dotted lines represent the weight for the 20<sup>th</sup> highest gene contribution in either factor. The Jaccard<sub>20</sub> index is shown and thus reflects the frequency of points in quadrant I over quadrants I,II and IV. For pairings in **D-I**, top shared genes in the upper right quadrant were put through Enrichr to find overrepresented cellular processes with the top result by p-value listed. Full Enrichr output can be found in the extended data.
- (J)** UMAP representation of the Fibroblast subset of S. Davidson et al. dataset colored by timepoint (n=316 cells).
- (K)** UMAP representation of the fibroblasts from C.X. Dominguez et al. 2020, derived from separate samples from the pancreas of a KPP GEMM animal, colored by adj. normal tissue vs. small vs. large tumors (n=8550 cells).
- (L)** A signature score was generated on the Fibroblast objects in **(J,K)** as well as the wound healing space-time points (17 space-time coordinates) using the top 10 genes contributing to each Mono\_mac factor (see **Supp. Figure 5B**). PCA was then performed on these 17 dimensions and each sample plotted in PC space (1<sup>st</sup> two PCs). Red arrows denote the various factor contributions to these PCs 1+2. Tumor datapoints denoted in blue and purple and wound healing space-time points in black. Arrow between tumor timepoints to highlight tumor stage progression for readability.
- (M)** Euclidean distances in PC space from B16F10 D5 and D11 samples to each of 17 wound healing space-time coordinates was calculated. Tileplot denotes the change in this distance between D11 and D5 samples. Negative values in red denote the tumor samples approaching that space-time point in PC space, while blue positive values denote distancing.
- (N)** Euclidean distances in PC space from adjacent normal and large tumor samples from the KPP model to each of 17 wound healing space-time coordinates was calculated. Tileplot denotes the change in this distance between adj. normal and large tumor samples. Negative values in red denote the tumor samples approaching that space-time point in PC space, while blue positive values denote distancing. See also Figure 5.



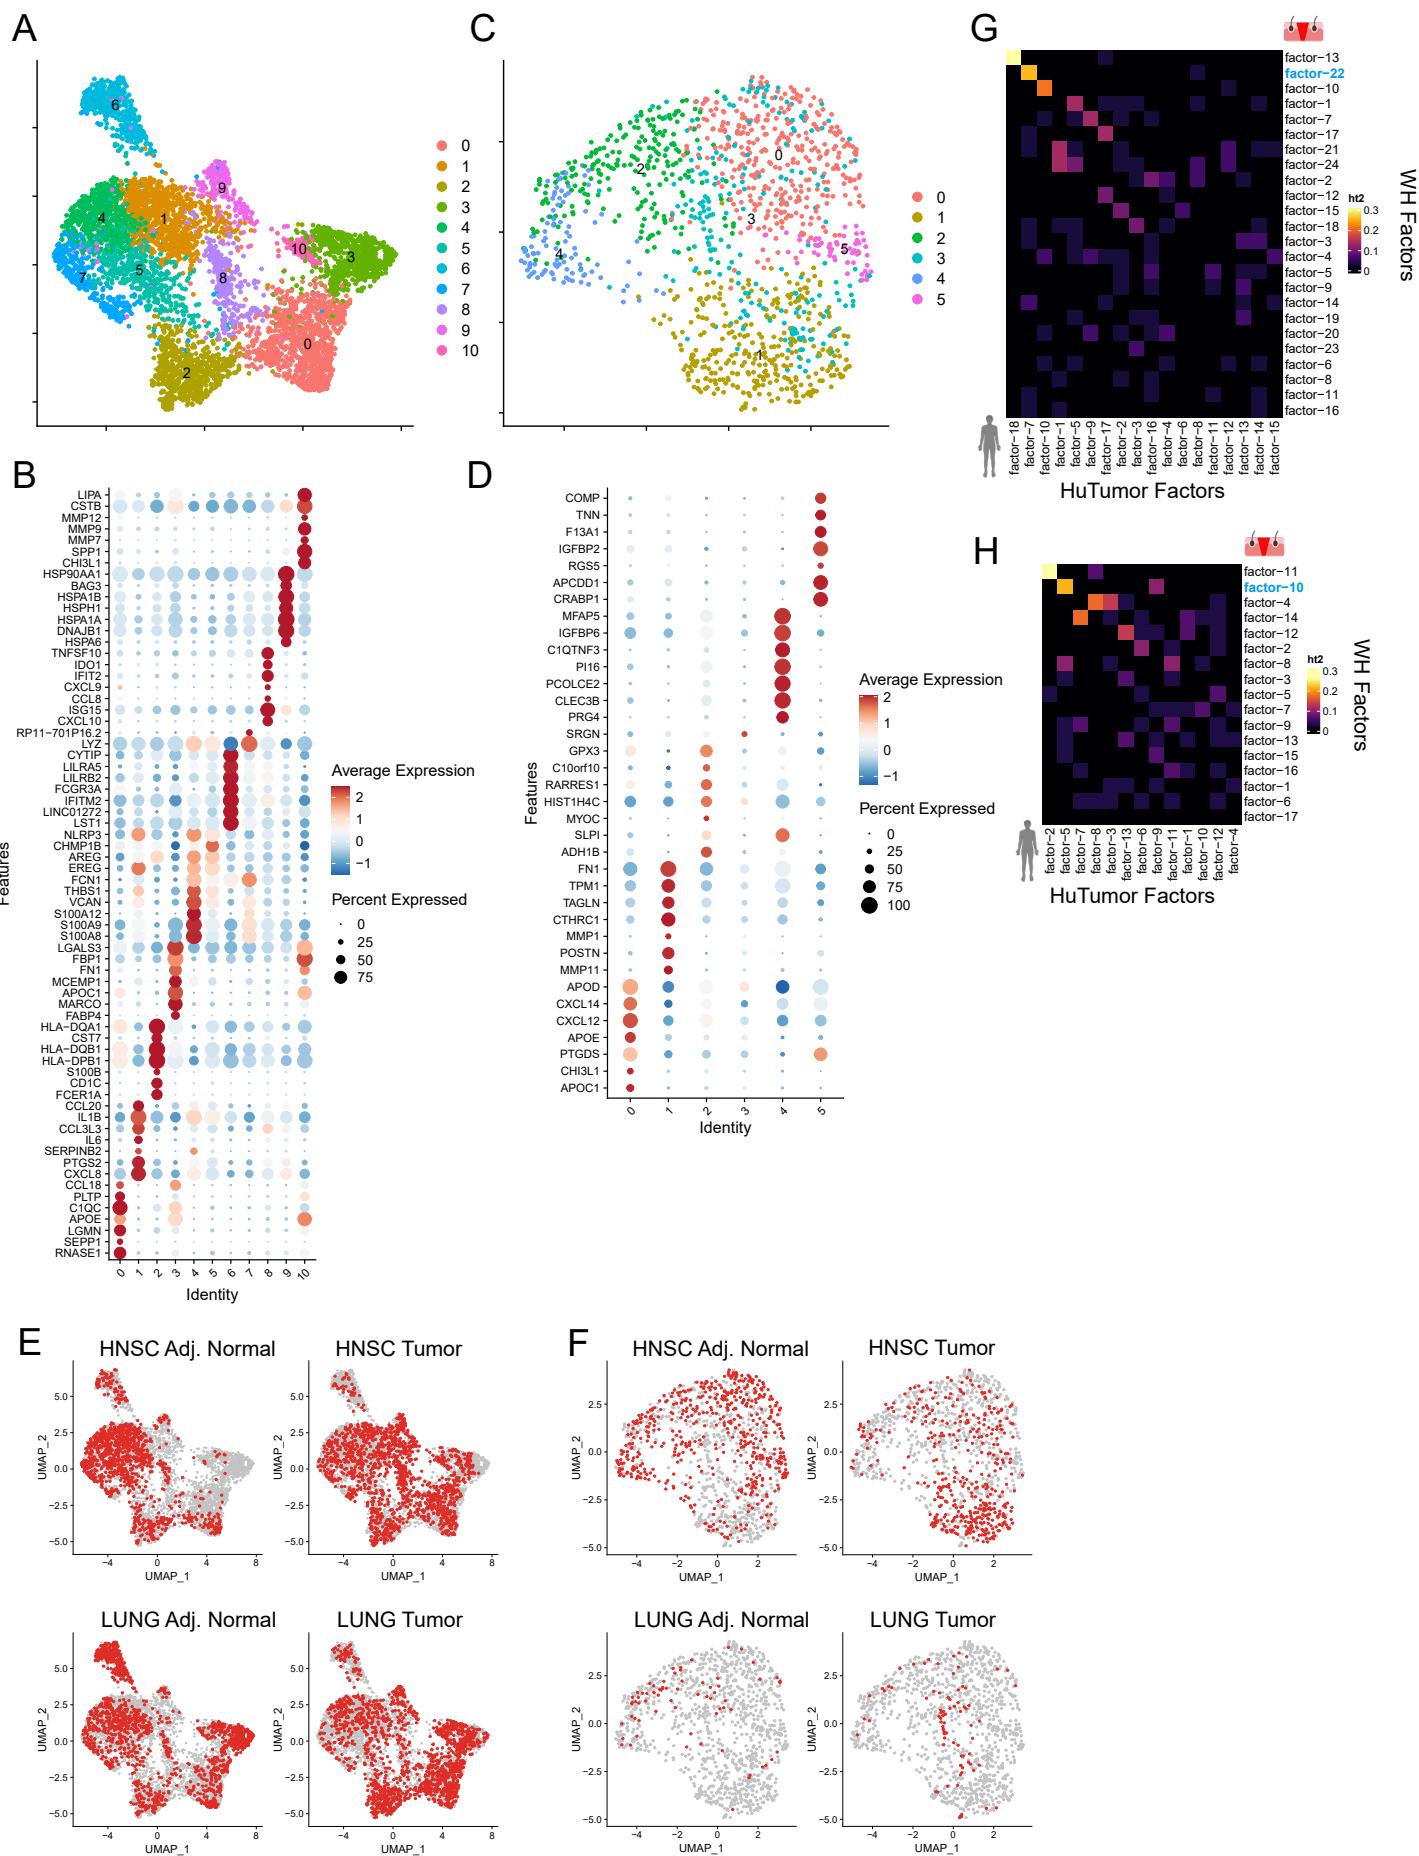

Supplementary Figure 6

**Supplementary Figure S6. Translation of mouse wound gene programs to human cancer, related to Figure 6.**

**(A)** Subsetted Mono\_Mac object from integrated human tumor scRNA-Seq datasets with cluster numbers denoted in UMAP representation (n=5612 cells).

**(B)** Dotplot representation of top 7 DE genes for clusters in (N) sorted by log(fold difference) with color representing average expression level and dot size representing the % of cells with a read for the gene.

**(C)** Subsetted Fibroblast object from integrated human tumor scRNA-Seq datasets with cluster numbers denoted in UMAP representation (n=1263 cells).

**(D)** Dotplot representation of top 7 DE genes for clusters in (P) sorted by log(fold difference) with color representing average expression level and dot size representing the % of cells with a read for the gene.

**(E)** UMAP representation of subsetted Mono\_Mac object from integrated human tumor scRNA-Seq datasets with cells from different tumor types and either tumor or normal tissue highlighted

**(F)** UMAP representation of subsetted Fibroblast object from integrated human tumor scRNA-Seq datasets with cells from different tumor types and either tumor or normal tissue highlighted.

**(G)** Heatmap showing the Jaccard<sub>20</sub> distance (defined in Materials & Methods) between all 22 M\_M wound healing and 18 M\_M HuTumor factors based on shared top contributing genes after converting mouse to human gene orthologs.

**(H)** Heatmap showing the Jaccard<sub>20</sub> distance (defined in Materials & Methods) between all 17 Fibroblast wound healing and 13 Fibroblast HuTumor factors based on shared top contributing genes after converting mouse to human gene orthologs.

See also Figure 6.

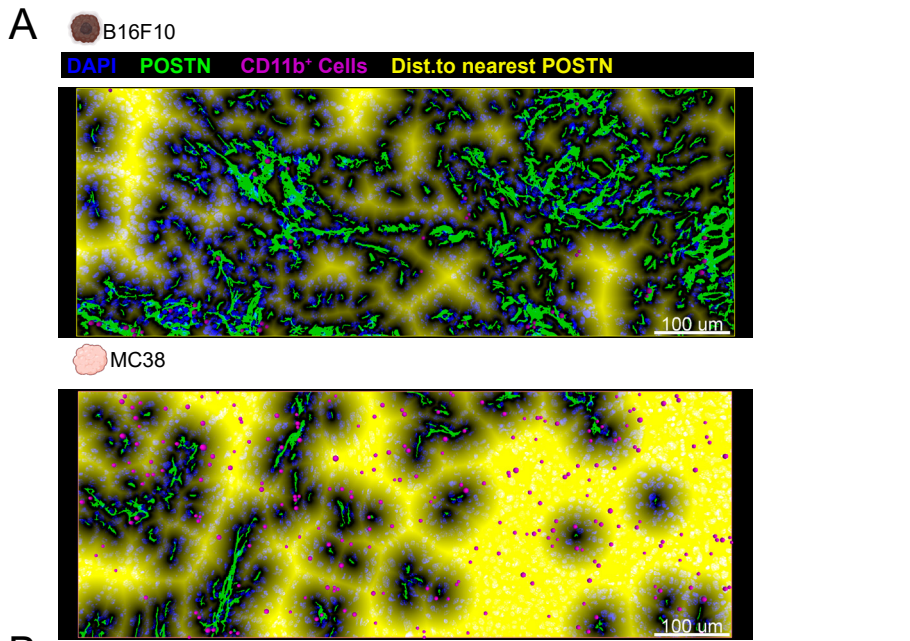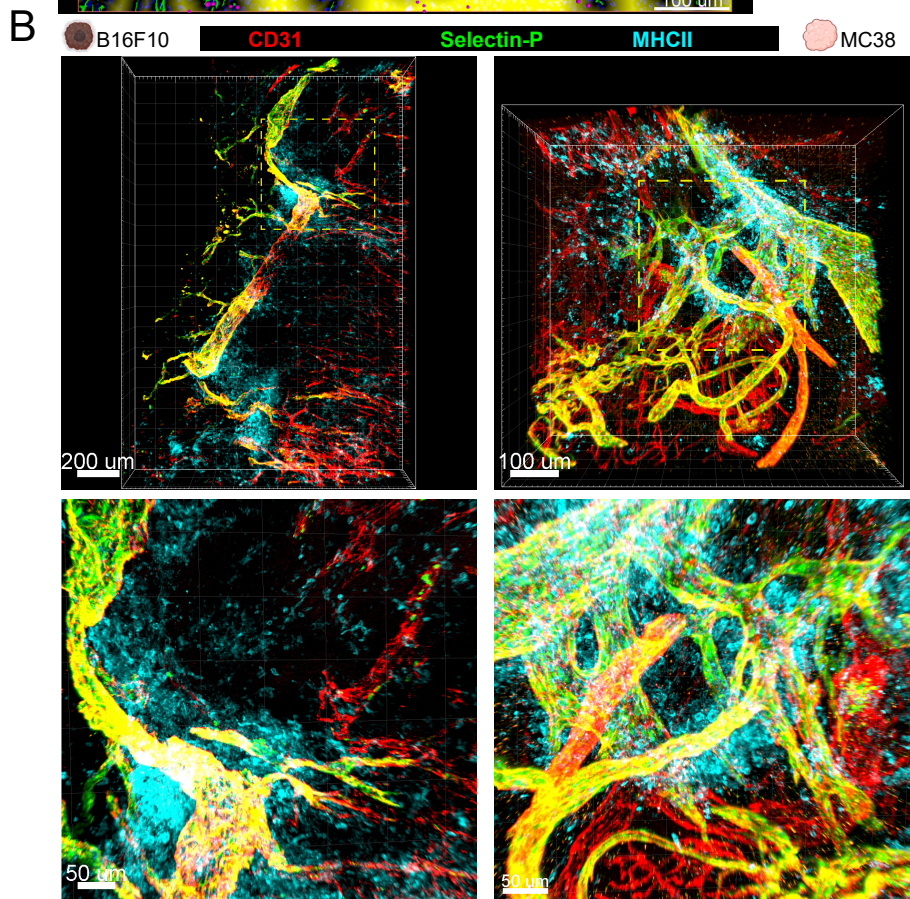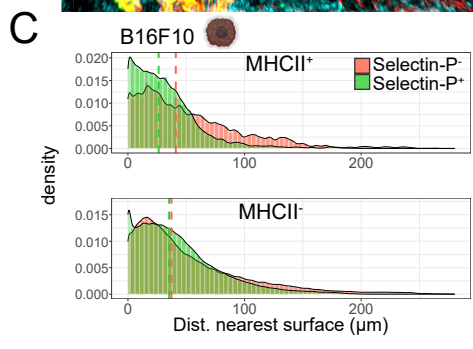

Supplementary Figure 7



**Supplementary Figure S7. Imaging of the tumor microenvironment highlights conserved gene program movements, related to Figure 7.**

**(A)** POSTN<sup>+</sup> surfaces generated via Imaris overlaid on top of IF images from B16F10 and MC38 tumors. Magenta dots denote DAPI<sup>+</sup> spots in close association (within 3  $\mu\text{m}$ ) of a CD11b<sup>+</sup> surface (defined as CD11b<sup>+</sup> Cells) and yellow signal denotes the distance transform from POSTN surfaces. Images representative of 3 separate tumor samples per type.

**(B)** 3D projections of cleared tissue imaging from 250  $\mu\text{m}$  thick tumor sections from B16F10 and MC38 tumors stained as indicated. Images representative of 4 tumor samples per type.

**(C)** Histograms indicating the distances of MHCII<sup>+</sup> spots and MHCII<sup>-</sup> spots to the nearest Selectin-P<sup>+</sup> or Selectin-P<sup>-</sup> surface in the MC38 and B16F10 models. Dashed line indicates the median. Histograms representative of 4 independent replicates (4 separate tumors).

See also Figure 7.

**Supplementary Table S1.**

Table listing cell types and subpopulations according to Space-Time Correlation Analysis (STCA) patterns. vSM, vascular smooth muscle. See also Figures 1, S1, 3, and S3.

| Cell Type             | Pattern                    |                                       |                                |                                                      |                           |                                          |
|-----------------------|----------------------------|---------------------------------------|--------------------------------|------------------------------------------------------|---------------------------|------------------------------------------|
|                       | WH-CM1: Early              | WH-CM2: Int-In, Intermediate Interior | WH-CM3: Late-In, Late Interior | WH-CM4: Late-Ex, Late Exterior                       | WH-CM5: Edge              | Other                                    |
| Neutrophils           | +<br>Neutrophil_1,2,3      | -                                     | +<br>Neutrophil_4              | -                                                    | -                         | -                                        |
| Mono_Mac              | +<br>Mono_2, Mono_Mac_1,2  | +<br>Mono_Mac_3                       | +<br>Mono_Mac_4,5              | +<br>Mono_Mac_6, Mono_Mac_MHCII, Mono_Mac_MHCII_Mgl2 | -                         | +<br>Mono_1, Mono_MHCII                  |
| Fibroblasts           | +<br>Fibro_1, inflammatory | +<br>Fibro_3, early myofibroblast     | +<br>Fibro_4, myofibroblast    | +<br>Fibro_5, homeostatic/universal                  | -                         | +<br>Fibro_2, immunomodulating/universal |
| Keratinocytes         | -                          | -                                     | -                              | +<br>keratinocytes_1,3,4,5                           | -                         | +<br>keratinocytes_2                     |
| Endothelial           | +<br>endothelial_cell_2    | -                                     | -                              | -                                                    | +<br>endothelial_cell_1,3 | -                                        |
| Mast cells            | -                          | -                                     | -                              | +<br>Mast cells                                      | -                         | -                                        |
| Dendritic cells       | -                          | -                                     | -                              | -                                                    | +<br>Dendritic cells      | -                                        |
| lymphoid              | -                          | -                                     | -                              | +<br>B cell, T cells_1,2                             | +<br>NK                   | -                                        |
| sebaceous gland       | -                          | -                                     | -                              | +<br>sebaceous gland                                 | -                         | -                                        |
| dermal sheath papilla | -                          | -                                     | -                              | +<br>dermal sheath papilla                           | -                         | -                                        |
| muscle                | -                          | -                                     | +<br>vSM_1, skeletal muscle    | +<br>vSM_2                                           | -                         | -                                        |
| melanocytes           | -                          | -                                     | -                              | -                                                    | -                         | +<br>melanocytes                         |
